1 A case-control study evaluating CT signs of xiphoid process associated with  
2 xiphodynia

3

4

5

6

7 Ryosuke Ono <sup>1,2\*</sup>, Ken Horibata <sup>1,2</sup>.

8

9 <sup>1</sup>Department of Community Medicine, Kameyama, Mie University School of  
10 Medicine, Tsu, Mie, Japan

11 <sup>2</sup>Department of Internal Medicine, Kameyama Municipal Medical Center,  
12 Kameyama, Mie, Japan

13

14 \* Corresponding author

15 E-mail: rikusan2005@yahoo.co.jp

16

17

18

19

20

21

22

23

24

25

26

27

28

29

30

31

32

33

34

35

36

## 37 **Abstract**

38 Objectives: To investigate whether CT signs of the xiphoid process, such as  
39 xiphisternal angle and evidence of soft tissue compression, are useful for  
40 diagnosing xiphodynia.

41 Design: A case-control study within a cohort.

42 Setting/Participants: Participants included 1560 individuals who visited a small  
43 urban hospital in Japan for chest or abdominal pain between January 2021 and  
44 September 2023. Those who underwent CT examinations including the xiphoid  
45 process were selected. Nine individuals diagnosed with xiphodynia were  
46 assigned to the case group, while 321 individuals diagnosed with other causes  
47 of pain were assigned to the control group.

48 Interventions: The xiphisternal angle, evidence of soft tissue compression  
49 anterior to the xiphoid process, anatomical features at the tip of the xiphoid  
50 process, and anatomical morphology of the xiphoid process were compared  
51 between the two groups.

52 Results: There was no significant difference in the xiphisternal angle between  
53 the two groups. No significant differences were observed in evidence of soft  
54 tissue compression anterior to the xiphoid process or anatomical features at the  
55 tip of the xiphoid process. New anatomical signs reveal that in approximately  
56 70% of cases, the xiphoid process curves forward and then backward.

57 Conclusions: The xiphoid process sternal angle is not useful for diagnosing  
58 xiphodynia. The curvature of the xiphoid process is frequently observed  
59 regardless of the presence of xiphodynia.

60

61

## 62 **Introduction**

63 Xiphodynia is a relatively rare condition characterized by pain originating from  
64 the xiphisternal joint or the xiphoid process. Although it does not typically  
65 progress to a severe state, prolonged pain can lead to a decrease in quality of  
66 life [1]. Symptoms of xiphodynia often manifest as chest pain or upper  
67 abdominal pain, but may also include radiating pain to the back, neck, or upper  
68 limbs. Due to these symptoms, it is commonly misdiagnosed as other conditions  
69 such as cardiovascular or gallbladder diseases. Additionally, due to low  
70 awareness of the condition, it frequently goes undiagnosed or treatment is

71 delayed [1]. While there is no established treatment, local injection of 40mg  
72 depot methylprednisolone and 50mg lidocaine at the most tender area on the  
73 xiphoid process has been reported to be effective [2]. In cases where there is  
74 poor response to local injection or in refractory cases, xiphoid process excision  
75 surgery is considered as an option [1].

76 While diagnostic criteria for xiphodynia have not been established, it is  
77 diagnosed by the presence of reproducible tenderness upon palpation of the  
78 xiphoid process [1,3]. As part of diagnostic treatment, injecting local anesthetic  
79 agents directly onto the xiphoid process can help relieve pain [4]. Additionally,  
80 organic diseases such as ischemic heart disease, gallbladder disorders, and  
81 gastroesophageal reflux disease have been reported to present similar  
82 symptoms, underscoring the importance of excluding these organic diseases  
83 [3,5].

84 It has been suggested that anterior protrusion of the xiphoid process is a risk  
85 factor for xiphodynia, and several reports suggest that using imaging tests to  
86 look at the xiphoid process from the side can help diagnose xiphodynia when it  
87 sticks out forward [6-9]. The largest study conducted to date was reported by  
88 Maigne et al., who compared the xiphisternal angle between lateral CT images  
89 of the xiphoid process in three patients diagnosed with xiphodynia and 60  
90 healthy individuals without xiphodynia. The results showed that the xiphisternal  
91 angles were 105°, 120°, and 135° in xiphodynia patients, while it was  $172 \pm 14^\circ$  in  
92 the healthy group. Therefore, they suggested that a decrease in the xiphisternal  
93 angle could be useful for diagnosing xiphodynia, proposing the possibility of  
94 inflammation around the xiphoid process due to anterior curvature being  
95 involved in the pathophysiology of xiphodynia [6]. However, due to the small  
96 sample size of three cases, the diagnostic accuracy was not clearly established,  
97 and even in the healthy group, 14 out of 60 individuals exhibited a decrease to  
98 140-159°. Furthermore, in our clinical experience, we often encounter patients  
99 with significant decreases in the xiphisternal angle but without symptoms.

100 Additionally, we have reported cases of xiphodynia with a xiphisternal angle of  
101 155°, which does not show a pronounced decrease [10]. Therefore, we question  
102 the utility of the xiphisternal angle for diagnosing xiphodynia.

103 Additionally, we believe that signs of the xiphoid process compressing anterior  
104 soft tissue or anatomical features at the tip of the xiphoid process may be useful  
105 for diagnosing xiphodynia. The anterior surface of the xiphoid process is  
106 attached to the rectus abdominis muscle, with subcutaneous tissue and skin

107 lying anteriorly [11]. Evidence of the xiphoid process tip compressing anterior  
108 soft tissue, including the rectus abdominis muscle, can be observed in many of  
109 the presented images in the literature on xiphodynia [6-8,10]. However, we  
110 could not find any reports investigating these details.  
111 In this study, we aim to evaluate whether CT signs such as xiphisternal angle and  
112 evidence of soft tissue compression are useful for the imaging diagnosis of  
113 xiphodynia.

114  
115

## 116 **Methods**

### 117 **Study design**

118 A case-control study within a cohort.  
119

### 120 **Population (Fig1)**

121 This study targeted patients who visited the internal medicine outpatient  
122 department of Kameyama Municipal Medical Center between January 2021 and  
123 September 2023 with complaints of chest pain or abdominal pain. Case group  
124 were defined as patients diagnosed with xiphodynia who underwent CT scans  
125 including the xiphoid process. Diagnosis of xiphodynia was defined as meeting  
126 all of the following criteria: (1) presence of chest or upper abdominal pain, (2)  
127 reproducible tenderness upon palpation of the xiphoid process, (3) absence of  
128 other conditions more likely than xiphodynia as the cause of pain, and (4)  
129 improvement of pain with local injection of anesthetic agents onto the xiphoid  
130 process or xiphoid process excision surgery. Control groups were defined as  
131 patients who underwent CT scans including the xiphoid process and were  
132 diagnosed with other conditions than xiphodynia as the cause of pain. Patients  
133 with unknown causes of pain were excluded from the control group.

134  
135  
136  
137

### **Fig1.**

### **Case and control groups inclusion flowchart.**

### 138 **sample size**

139 It was calculated based on a case-control study by Maigne et al. regarding the  
140 xiphoid process sternal angle [6]. Using a factor of the xiphoid process sternal  
141 angle being less than  $160^\circ$ , the assumed proportion of cases with this factor was  
142 0.8. Given that 14 out of 60 cases were less than  $160^\circ$  based on previous studies,  
143 the proportion for the control group was set at 0.23. With an  $\alpha$  error of 0.05,  
144 power of 0.8, and a case-to-control ratio of 1:10, the calculation resulted in 7  
145 cases and 70 controls.

146

## 147 **Data collection**

148 From October 1, 2023, to March 31, 2024, we accessed patients' medical records  
149 and CT images to collect data. From medical records, we extracted age, gender,  
150 site of pain, and underlying cause of pain. The signs of CT examinations were  
151 measured by creating sagittal images including the xiphoid process from the  
152 thinnest axial section.

153 The method for measuring the xiphisternal angle was not defined in previous  
154 literature, resulting in two patterns: one measured between the xiphoid process  
155 and the sternal body angle, and the other between the xiphoid process and the  
156 base of the xiphoid process [6-9]. Additionally, since the xiphoid process may  
157 bend midway or invert, the angle can vary significantly depending on whether it  
158 is measured at the tip or before inversion. Therefore, we defined and measured  
159 four angles: xiphoid-sternal body angle (XSBA), xiphoid to xiphoid base angle  
160 (XXBA), xiphoid tip to sternal body angle (XTSBA), and tip to base angle of xiphoid  
161 process (TBAXP), as shown in Fig2.

162

### 163 **Fig2.**

#### 164 **The definition of the xiphisternal angle.**

165 A: A line connecting the midpoint of the cranial end and the midpoint of the  
166 caudal end of the sternal body.

167 B: A tangent line to the midline of the base of the xiphoid process (excluding the  
168 xiphisternal joint).

169 C: A tangent line to the midline at the maximum ventral curvature of the xiphoid  
170 process.

171 D: A tangent line at the tip of the xiphoid process.

172 XSBA: The angle between line A and line C, with line A as the baseline.

173 XXBA: The angle between line B and line C, with line B as the baseline.

174 XTSBA: The angle between line A and line D, with line A as the baseline.

175 TBAXP: The angle between line B and line D, with line B as the baseline.

176

177 Regarding compression signs caused by the xiphoid process, we assumed and  
178 measured the anterior shift of the rectus abdominis (ASRA), anterior shift of the  
179 skin surface (ASSS), and thinness of the subcutaneous tissue (TST) as useful  
180 indicators (Fig3). As for anatomical signs at the tip of the xiphoid process, we  
181 measured the penetration of the xiphoid tip into the rectus abdominis (PXTRA),  
182 calcification of the xiphoid tip (CXT), and hypertrophy of the rectus abdominis  
183 (HRA) in contact with the tip of the xiphoid process (Fig3). The definitions for each  
184 sign are as follows: (1) ASRA: At the most ventral projection of the xiphoid  
185 process, the rectus abdominis shifts anteriorly. (2) ASSS: At the most ventral  
186 projection of the xiphoid process, the skin surface line shifts anteriorly. (3) TST:  
187 Subcutaneous tissue compressed by the xiphoid process is thinner than  
188 surrounding tissue. (4) PXTRA: The tip of the xiphoid process contacts the rectus  
189 abdominis, and the tip and rectus abdominis are not parallel. (5) CXT: In CT  
190 abdominal conditions, there is calcification at the tip of the xiphoid process. (6)  
191 HRA: At the point of contact with the xiphoid process, the rectus abdominis is  
192 thicker than the surrounding rectus abdominis. For cases with multiple tips of the  
193 xiphoid process, measurements for each sign were taken at the tip with a positive  
194 PXTRA. In cases where this criterion was not applicable, measurements were taken  
195 at the longest tip.

196

197 **Fig3.**

198 **Illustration of a CT sagittal image around the xiphoid process and**  
199 **descriptions of soft tissue compression signs and anatomical features of the**  
200 **xiphoid tip.**

201 The xiphoid process compresses the rectus abdominis and skin ventrally, leading  
202 to positive signs for ASRA and ASSS (a). While the xiphoid tip protrudes into the  
203 rectus abdominis, resulting in a positive PXTRA sign, there's no rectus abdominis  
204 thickening, hence a negative HRA sign (b). Subcutaneous tissue thins due to  
205 xiphoid pressure, resulting in a positive TST sign (c).

206

207 As additional items for CT signs, we recorded the imaging range of the CT, the  
208 slice thickness of the original CT images, and anatomical features of the xiphoid  
209 process (shape, number of tips, xiphoid foramen, fractures). Regarding the shape

210 of the xiphoid process, forward curvature was denoted as "F", backward curvature  
211 as "B", and the curvature sequence from the base of the xiphoid process was  
212 represented (e.g., if the sequence is F→B→F, it is labeled as "FBF type"), defining  
213 it based on the number and direction of curvatures (Fig4). All observations were  
214 assessed by the same evaluator.

215

216 **Fig4.**

217 **Examples of the xiphoid process shape, soft tissue compression signs, and**  
218 **anatomical findings of the xiphoid tip (exclude CXT).**

219 The shape of the xiphoid process is defined by noting any bends from its base,  
220 using 'F' for forward bends and 'B' for backward bends. If it is straight, we denote  
221 it as 'S'.

222

## 223 **Statistical analyses**

224 Each variable will be compared between case and control groups. For binary  
225 variables, odds ratios for case/control group will be calculated. For continuous  
226 variables, a two-sample t-test will be conducted. Data aggregation will be  
227 performed using Microsoft Excel®, and data analysis will be carried out using  
228 EZR on R-commander (version 1.41 for Windows) [12].

229

## 230 **Ethics approval**

231 This study involves human participants and was approved by Kameyama  
232 Municipal Medical Center Medical Research and Ethics Committee (code  
233 No.2023092101). Informed consent was not obtained verbally; instead, it was  
234 obtained through written opt-out notices posted on the outpatient bulletin  
235 board at Kameyama Municipal Medical Center. Those who rejected were  
236 excluded. An anonymization table was created separately from the database,  
237 and all data was completely anonymized before analysis. No personally  
238 identifiable information, such as names or addresses, was entered into the  
239 database.

240

241

## 242 **Results**

## 243 **Baseline characteristics**

244 During the study period, 1560 patients presented with chest pain or abdominal  
245 pain. Among them, 11 were diagnosed with xiphodynia, with 10 meeting all  
246 criteria for xiphodynia. Nine of these, excluding one who did not undergo a CT  
247 scan including the xiphoid process, were assigned to the case group. The  
248 control group comprised 321 individuals who were diagnosed with other causes  
249 of pain and underwent CT scans including the xiphoid process.

250 Table 1 presents the demographic characteristics of patients in both the case  
251 and control groups. There were no significant differences in age and gender  
252 between the case and control groups. In the control group, the most common  
253 causes of pain were gastrointestinal disorders such as intestinal obstruction (27  
254 cases), ischemic colitis (19 cases), appendicitis (19 cases), diverticulitis (17 cases),  
255 totaling 103 cases, followed by renal and urinary tract disorders such as ureteral  
256 stones (54 cases), totaling 64 cases.

257

258 **Table1. Characteristics of case and control groups.**

|                        | <b>Case(n=9)</b> | <b>Control(n=321)</b> | <b>P value</b> |
|------------------------|------------------|-----------------------|----------------|
| Background             |                  |                       |                |
| Age(year), mean(SD)    | 71(15)           | 68(21)                | 0.63           |
| Male, n(%)             | 4(44.4)          | 150(46.7)             | 1              |
| Location of pain, n(%) |                  |                       |                |
| Chest pain             | 3(33.3)          | 43(13.4)              |                |
| Abdominal pain         | 8(88.9)          | 286(89.1)             |                |
| Cause of pain, n(%)    |                  |                       |                |
| Lung disease           | -                | 10(3.1)               |                |
| Heart disease          | -                | 17(5.3)               |                |
| Gastroduodenal disease | -                | 20(6.2)               |                |
| Intestinal disease     | -                | 103(44.6)             |                |
| Liver disease          | -                | 5(1.6)                |                |



|                             |         |           |
|-----------------------------|---------|-----------|
| Biliary tract disease       | -       | 33(10.3)  |
| Pancreas disease            | -       | 3(0.9)    |
| Uterine ovarian disease     | -       | 15(4.7)   |
| Renal urinary tract disease | -       | 64(19.9)  |
| Cancer                      | -       | 25(7.8)   |
| Musculoskeletal disease     | -       | 15(4.7)   |
| Other disease               | -       | 11(3.4)   |
| CT imaging range, n(%)      |         |           |
| Chest                       | 7(77.8) | 116(36.1) |
| Abdomen                     | 4(44.4) | 302(94.1) |
| CT slice thickness, n(%)    |         |           |
| 1.25mm                      | 9(100)  | 168(52.3) |
| 2.5mm                       | 0(0)    | 14(4.4)   |
| 5mm                         | 0(0)    | 139(43.3) |

259

## 260 Xiphisternal angle (Table 2)

261 There were no significant differences observed between the two groups in any  
 262 of the four defined angles. In the control group, 21 cases had the xiphoid  
 263 process base not captured in the imaging, thus preventing measurement of all  
 264 four angles. Additionally, XSBA and XSTBA measurements were not possible in  
 265 175 cases due to insufficient imaging of the sternum; these cases were excluded  
 266 from the analysis for each respective angle. The range of xiphisternal angles in  
 267 the case group was XSBA 104-174°, XXBA 91-163°, XTSBA 129-298°, and TBAXP  
 268 135-295°. In the control group, the ranges were XSBA 10-230°, XXBA 7-197°,  
 269 XTSBA 10-379°, and TBAXP 7-363°.

270

## 271 Table2. Comparison of CT signs between case and control groups.

|  | Case(n=9) | Control(n=321) | OR(95%CI) |
|--|-----------|----------------|-----------|
|--|-----------|----------------|-----------|

| Xiphisternal angle, mean(SD) *        |             |             |                    |
|---------------------------------------|-------------|-------------|--------------------|
| XSBA                                  | 142.1(22.3) | 144.7(29.2) |                    |
| XXBA                                  | 144.3(17.5) | 139.9(26.1) |                    |
| XTSBA                                 | 204.2(59.4) | 194.6(58.2) |                    |
| TBAXP                                 | 206.4(58.3) | 185.2(48.9) |                    |
| Soft tissue compression signs, n(%)   |             |             |                    |
| ASRA                                  | 7(77.8)     | 211(65.7)   | 1.82(0.34 to 18.2) |
| ASSS                                  | 1(11.1)     | 113(35.2)   | 0.23(0.01 to 1.76) |
| TST                                   | 7(77.8)     | 200(62.3)   | 2.12(0.39 to 21.1) |
| Anatomical signs of xiphoid tip, n(%) |             |             |                    |
| PTXRA                                 | 2(22.2)     | 55(17.1)    | 1.38(0.14 to 7.51) |
| CXT                                   | 0(0)        | 77(24.0)    | 0(0 to 21.97)      |
| HRA                                   | 0(0)        | 8(2.5)      | 0(0 to 23.95)      |
| Anatomical characteristics **         |             |             |                    |
| Shape of xiphoid process, n(%)        |             |             |                    |
| S                                     | 0(0)        | 12(3.7)     |                    |
| F                                     | 3(33.3)     | 72(22.4)    |                    |
| FB                                    | 5(55.6)     | 213(66.4)   |                    |
| FBF                                   | 1(11.1)     | 19(5.9)     |                    |
| FBB                                   | 0(0)        | 2(0.6)      |                    |
| FBFB                                  | 0(0)        | 2(0.6)      |                    |
| Number of tips, n(%)                  |             |             |                    |
| 1                                     | 7(77.8)     | 262(81.6)   |                    |
| 2                                     | 2(22.2)     | 57(17.8)    |                    |
| 3                                     | 0(0)        | 1(0.3)      |                    |

|                       |            |            |
|-----------------------|------------|------------|
| Xiphoid foramen, n(%) | 2(22.2)    | 47(14.6)   |
| Length, mean(SD)      | 60.6(11.1) | 60.4(15.0) |

272 \* We excluded cases where all four angles couldn't be measured due to the  
273 xiphoid process base not being within the imaging range in 21 controls.  
274 Additionally, 175 controls were excluded from XSBA and XSTBA measurements  
275 because the sternum wasn't adequately imaged.

276 \*\* We omitted one case of xiphoid process absence from the description but  
277 included it in the denominator for probability calculations.

278

## 279 **Compression signs of soft tissues (Table 2)**

280 There were no significant differences observed between the two groups in any  
281 of the ASRA, ASSS, or TST signs.

282

## 283 **Anatomical signs and morphology of the xiphoid process (Table** 284 **2)**

285 There were no significant differences observed between the two groups in any  
286 of the PXTRA, CXT, or HRA signs. Regarding the morphology of the xiphoid  
287 process, the FB type was the most common in both the case and control groups,  
288 followed by the F type, together comprising approximately 90% of the total.  
289 Within the control group, there was one case of complete absence of the  
290 xiphoid process and one case of xiphoid process fracture with bone fragment  
291 detachment. The tip of the xiphoid process was single in 269 cases, double in 59  
292 cases, and triple in one case. Xiphoid foramen was observed in 49 cases. There  
293 were no significant differences observed between the case and control groups  
294 in the ratios of these morphologies. The length of the xiphoid process showed  
295 no significant difference between the case group ( $60.6 \pm 11.1$ ) and the control  
296 group ( $60.4 \pm 15.0$ ).

297

## 298 **Relationship between patient demographics and anatomical** 299 **features of the xiphoid process**

300 We investigated the association between age, gender, and xiphisternal angle  
301 (XXBA), as well as between age, gender, and xiphoid process length. XXBA,  
302 which is less affected by tip inversion and has a larger sample size, was utilized.  
303 Outliers for each variable were excluded. We found a very weak correlation  
304 between age and XXBA (correlation coefficient -0.16, 95% CI: -0.27 to -0.05,  $p =$   
305 0.005), but no significant correlation between age and xiphoid process length  
306 (correlation coefficient -0.04, 95% CI -0.16 to 0.09,  $p = 0.56$ ). The scatter plots  
307 for each variable are shown in Fig5. Additionally, there was no significant  
308 difference between gender and XXBA (males:  $138.6 \pm 25.8^\circ$  vs. females:  $141.4 \pm$   
309  $26.1^\circ$ ,  $p = 0.34$ ), whereas a significant difference was observed between gender  
310 and xiphoid process length (males:  $61.5 \pm 11.7$  cm vs. females:  $57.7 \pm 10.6$  cm,  $p$   
311  $= 0.005$ ).

312

313 **Fig5.**

314 **A scatter plot depicting the correlation between age and the length of the**  
315 **xiphoid process, as well as the correlation between age and the xiphisternal**  
316 **angle.**

317

318

## 319 **Discussion**

320 In our study, we investigated CT signs useful for diagnosing xiphodynia.  
321 However, no significant differences were observed between the two groups in  
322 terms of the xiphisternal angle, which has been considered useful in previous  
323 studies. Additionally, among the compression signs of soft tissues anterior to  
324 the xiphoid process and anatomical signs at the tip of the xiphoid process, no  
325 signs were found to have odds ratios indicative of diagnostic utility.  
326 One reason why we did not find a significant difference in the xiphisternal angle  
327 might be that, unlike previous research, even the control group had smaller  
328 angles. In Maigne et al.'s study, the control group's angle averaged  $172 \pm 15^\circ$  [6],  
329 while in our study, the XSBA and XXBA in the control group were around  $140^\circ$ .  
330 This could be because of differences in the age distribution of the control  
331 groups. In Maigne et al.'s study, the control group consisted of 60 individuals  
332 without xiphodynia, with an average age of  $55 \pm 2$  years [6]. On the other hand,  
333 the control group in our study had an average age of  $68 \pm 21$  years, indicating  
334 older age and greater variability compared to the previous study. The weak but

335 positive correlation observed between XXBA and age in our study suggests that  
336 the older age of our control group may have contributed to lower xiphisternal  
337 angles. Secondly, it is well-established that skeletal differences exist among  
338 races, and it's possible that racial differences within the control group influenced  
339 the angles. Although we did not find prior studies discussing racial differences  
340 in the xiphoid process, research has reported skeletal variations between  
341 Western and Eastern populations in cranial and pelvic bones [13]. Since our  
342 study was conducted in Japan and Maigne et al.'s study was conducted in  
343 France, there is a possibility that differences in skeletal morphology due to race  
344 could have influenced the angles. Thirdly, the lack of clear definition for the  
345 xiphisternal angle in previous studies might have contributed to this outcome.  
346 While such differences exist between our study and previous research, our study  
347 suggests that a decrease in xiphisternal angle is common even in healthy  
348 individuals. Perhaps, our focus on xiphisternal angles has been limited to  
349 instances of xiphodynia, leading to a misconception that decreased xiphisternal  
350 angles are specific findings for xiphodynia.  
351 Furthermore, in our study, the xiphisternal angle in the case group was larger  
352 than in previous studies. In prior research, many cases with decreased  
353 xiphisternal angle on CT images have been reported. Maigne et al. reported  
354 three cases with angles of 105°, 120°, and 135° [6], Patel et al. reported one case  
355 with an angle of 100° [14], Ono et al. reported one case with an angle of 128°  
356 [7], Ishizuka et al. reported one case with an angle of 133° [8], and Ismail et al.  
357 reported one case with an angle of 138.4° [15]. Additionally, although not  
358 explicitly stated the angles, there are numerous reports of cases with images  
359 showing a prominently upwardly curved xiphoid process [9,16-18]. Conversely,  
360 in case series literature, there are more reports of cases with larger xiphisternal  
361 angles. Bakens et al. reported 19 cases who underwent xiphoidectomy for  
362 xiphodynia, with 15 cases having xiphisternal angle measurements ranging from  
363 103° to 177°, with an average of  $149.1 \pm 19.5^\circ$  [19]. Dorn et al. reported 11 cases  
364 who underwent xiphoidectomy for xiphodynia, with all cases having xiphisternal  
365 angle measurements ranging from 120° to 208°, with an average of  $156.1 \pm 23.8^\circ$   
366 [20]. While there may be slight variations in angle definitions, the xiphisternal  
367 angles in our case group were in the early 140s, which is similar to those  
368 observed in the two case series. This similarity suggests that a significant  
369 reduction in the xiphisternal angle is not a common feature in many cases of  
370 xiphodynia. Therefore, the absence of a decrease in xiphisternal angle should

371 not lead to underestimating the possibility of xiphoidynia, and xiphisternal angle  
372 may not be a useful diagnostic tool for xiphodynia.

373 Regarding compression signs of soft tissues, no signs indicating useful odds  
374 ratios for diagnosis were identified in our study. Xiphodynia is a relatively rare  
375 condition with low awareness among physicians, and studies conducted solely  
376 in single institutions have limited case numbers. In the future, collaborative  
377 multicenter studies with increased case numbers are desired.

378 One of the achievements of our study is the acquisition of new insights into the  
379 anatomical features of the xiphoid process and the CT interpretation methods.  
380 Initially, we hypothesized that inflammation-induced thickening of the xiphoid  
381 process was caused by its tip penetrating the rectus abdominis muscle, and  
382 thus, they incorporated hypertrophy of the rectus abdominis (HRA) into the  
383 study. However, it was found that the cartilaginous portion of the xiphoid  
384 process tip was in contact with the rectus abdominis muscle, and both  
385 structures had similar CT values, leading to the appearance of rectus abdominis  
386 hypertrophy. It was realized that a slice thickness of 5mm was insufficient for  
387 distinguishing this example, necessitating imaging with a slice thickness of  
388 1.25mm. Additionally, since calcification at the tip of the xiphoid process (CXT  
389 positive) was observed in only 23% of cases, there is a possibility of  
390 misinterpreting the calcified portion as the true tip of the xiphoid process. To  
391 confirm the non-calcified portion, conditions in the abdominal sagittal plane  
392 were found to be suitable. When assessing the anatomical features of the  
393 xiphoid process tip on CT, imaging with abdominal conditions of 1.25mm slice  
394 thickness or less and confirmation using sagittal reconstruction images are  
395 necessary.

396 Additionally, it was found that the anatomical feature of the xiphoid process  
397 known as the "FB type," where the xiphoid process curves forward and then  
398 reverses backward, accounted for more than 60% of cases. In a study by Akin et  
399 al., which assessed the shape of the xiphoid process using MDCT images of 500  
400 individuals, a shape referred to as the "S-shape," where the xiphoid process  
401 curved forwardly and then reversed backwardly, was identified in 4 cases (0.8%)  
402 [21]. Although the study did not discuss events where the xiphoid process  
403 reversed, multiple figures presented as cases of forwardly curved xiphoid  
404 process in the same literature confirm reversing after contact between the  
405 cartilage part of the xiphoid process tip and the rectus abdominis muscle.  
406 Moreover, numerous studies on xiphodynia have presented images showing

407 reversal [14,19,22], indicating that reversal of the xiphoid process tip is a  
408 common occurrence regardless of the presence of xiphodynia. In our study, no  
409 cases exhibited a shape where the xiphoid process first curved backwardly  
410 (toward the heart) from the base (B or BF type). There were also few cases with  
411 shapes like FBF or FBFB where the xiphoid process reverses forwardly again, and  
412 in such cases, the liver was positioned backwardly to the xiphoid process (Fig4).  
413 From these observations, we believe that the xiphoid process bends forwardly  
414 due to pressure from internal organs such as the heart or liver, and backwardly  
415 reverses due to pressure from abdominal wall like the rectus abdominis. We  
416 speculate that the positive correlation observed between age and xiphisternal  
417 angle in our study may be attributed to worsening kyphosis with age, leading to  
418 increased pressure from internal organs on the xiphoid process. It is noteworthy  
419 that there was no difference in the shape of the xiphoid process between the  
420 case and control groups, suggesting that the likelihood of curvature or reversal  
421 of the xiphoid process being associated with xiphodynia is low. However,  
422 considering the common occurrence of reversal of the xiphoid process tip, it is  
423 inappropriate to use TBAXP or XTSBA, which use the xiphoid process tip as the  
424 baseline for xiphisternal angle measurements. Instead, it is advisable to use  
425 XXBA or XSBA, which use the baseline where the xiphoid process is most  
426 forwardly curved or just before it contacts the rectus abdominis muscle.  
427

## 428 **Limitation**

429 Firstly, since this study is a case-control study within a cohort, the control group  
430 does not consist of individuals who are non-xiphodynia. Diagnosis of xiphodynia  
431 is typically based on medical history, physical examination, and exclusion  
432 diagnosis, which are minimally invasive, and the control group should comprise  
433 individuals without the condition ideally. Additionally, although there is a report  
434 indicating a prevalence of xiphodynia in hospitalized cases at 2% [23], the exact  
435 prevalence is unknown, and there is a possibility that a considerable number of  
436 xiphodynia patients may be included in the control group. In the future,  
437 investigations into the prevalence are necessary, and if a study is to be  
438 conducted with an increased sample size, using a prospective control group  
439 without the disease would be appropriate. Secondly, the sample size was  
440 insufficient to compare findings such as compression signs of soft tissues and  
441 anatomical features of the xiphoid process tip. Xiphodynia is a relatively rare

442 condition, and evaluation in a single institution has its limitations, thus  
443 collaborative research across multiple institutions to increase the sample size is  
444 desirable. Thirdly, there is a possibility that the definition of the sternal baseline  
445 used for measuring the xiphisternal angle was not appropriate. While a linear  
446 sternum poses no issues, if the sternum is arc-shaped, the angle may vary  
447 slightly depending on whether the baseline is defined as in this study or  
448 tangentially to the circular sternum. Since tangential direction assessment may  
449 lead to variability among evaluators, we opted for our original definitions for  
450 this study, which is easier to judge as a landmark. Fourthly, regarding  
451 compression signs of soft tissues, there is a potential for variation depending on  
452 the position, but CT examination is limited to the supine position, possibly  
453 missing patients with compression signs appearing in the upright or seated  
454 positions. Ultrasound examinations can be performed regardless of position,  
455 suggesting their potential usefulness in evaluating compression signs of soft  
456 tissues, which warrants further investigation.

457

458

## 459 **Conclusion**

460 The xiphisternal angle was suggested to be ineffective in the imaging diagnosis  
461 of xiphodynia. The compression signs of soft tissues and anatomical features of  
462 the xiphoid process tip set in this study warrant a reassessment with an  
463 increased number of cases. Additionally, xiphoid process reversing is frequently  
464 observed regardless of the presence of xiphodynia, with forward curvature likely  
465 influenced by pressure from internal organs and backward curvature by  
466 pressure from the abdominal wall. For confirming these, CT conditions involving  
467 axial slices of 1.25mm thickness or less in the abdominal region are  
468 recommended.

469

470

## 471 **References**

- 472 1. Noor N, Amgalan A, Vij N, Habib K, Anantuni L, An D, et al. Treatment and  
473 Management of Xiphoidalgia. *Orthopedic Reviews*. 2022;14(3):37070. doi:  
474 10.52965/001c.37070.



- 475 2. Shilo L, Hadari R, Shabun A, Shilo D, Kitay-Cohen Y. Xiphodynia: An easily  
476 diagnosed but frequently overlooked cause of non-cardiac chest pain. J  
477 Musculoskelet Pain. 2014;22(4):378-381.  
478 doi:10.3109/10582452.2014.962212.
- 479 3. Simpson JK, Hawken E. Xiphodynia: A diagnostic conundrum. Chiropr  
480 Osteopat. 2007;15:1-6. doi:10.1186/1746-1340-15-13.
- 481 4. Sklaroff HJ. Xiphoidynia-another cause of atypical chest pain: six case  
482 reports. Mt Sinai J Med. 1979;46(6):546-548.
- 483 5. Koren W, Shahar A. Xiphodynia masking acute myocardial infarction: A  
484 diagnostic Cul-de-Sac. Am J Emerg Med. 1998;16(2):177-178.  
485 doi:10.1016/s0735-6757(98)90041-9.
- 486 6. Maigne JY, Vareli M, Rousset P, Cornelis P. Xiphodynia and prominence of  
487 the xyphoid process. Value of xiphosternal angle measurement: Three case  
488 reports. Jt Bone Spine. 2010;77(5):474-476. doi:10.1016/j.jbspin.2010.04.009.
- 489 7. Ono R, Hamano H, Yarita T. Xiphodynia. Intern Med. 2022;61(1):131.
- 490 8. Ishizuka K, Yokokawa D, Mori T, Kato T, Yamamoto D, Ikusaka M.  
491 Xiphodynia. Am J Med 2021;134(3):e215-e216.
- 492 9. Eulálio Filho WMN, Barbosa DJM, de Sousa Junior EC. Xiphodynia: a rare  
493 cause of epigastric pain. Internal and Emergency Medicine 2018;13:127-128.
- 494 10. Ono R, Horibata K. Xiphodynia with limited decrease in the xiphoid process-  
495 sternal angle but recognised compression of the rectus abdominis. BMJ  
496 Case Rep. 2024 Feb 7;17(2):e259176. doi: 10.1136/bcr-2023-259176.
- 497 11. J Keith Simpson, Erin Hawken. Xiphodynia: A diagnostic conundrum. Chiropr  
498 Osteopat. 2007;15:13.
- 499 12. Y Kanda. Investigation of the freely available easy-to-use software 'EZR' for  
500 medical statistics. Bone Marrow Transplantation 2013;48:452-458.
- 501 13. Torimitsu S, Nakazawa A, Flavel A, Swift L, Makino Y, Iwase H, et al.  
502 Population affinity estimation using pelvic measurements based on  
503 computed tomographic data acquired from Japanese and Western  
504 Australian populations. Int J Legal Med. 2024 Feb 6. doi: 10.1007/s00414-  
505 024-03178-3.
- 506 14. Patel K, Olson K, Peeraphatdit TB. An Unusual Case of Refractory Abdominal  
507 Pain: Don't Miss the Point. Gastroenterology. 2023 May;164(6):891-892. doi:  
508 10.1053/j.gastro.2021.06.028. Epub 2021 Jun 17.

- 509 15. Ismail Dal, Eyup Halit Yardimci, Zahide Doganay. Xiphodyna. Indian Journal  
510 of Surgery. April 2023;85(2):436–437 [https://doi.org/10.1007/s12262-022-](https://doi.org/10.1007/s12262-022-03409-0)  
511 03409-0
- 512 16. Hogerzeil DP, Hartholt KA, de Vries MR. Xiphoidectomy: A Surgical  
513 Intervention for an Underdocumented Disorder. Case Rep Surg.  
514 2016;2016:9306262. doi: 10.1155/2016/9306262.
- 515 17. Yapici Ugurlar O, Ugurlar M, Ozel A, Erturk SM. Xiphoid syndrome: an  
516 uncommon occupational disorder. Occup Med (Lond). 2014 Jan;64(1):64-6.  
517 doi: 10.1093/occmed/kqt132.
- 518 18. Tsuchida T, Ishizuka K, Ohira Y. Xiphodynia Caused by a Large Xiphoid  
519 Process. Cureus. 2023 Sep 1;15(9):e44516. doi: 10.7759/cureus.44516.
- 520 19. Bakens MJAM, Andel PCM, Daemen JHT, Hulsewé KWE, Vissers YLJ, de Loos  
521 ER. A caseseries: xiphoidectomy for xiphodynia, a rare thoracic wall disorder.  
522 J Thorac Dis. 2021 Apr;13(4):2216-2223. doi: 10.21037/jtd-20-3396.
- 523 20. Dorn P, Kuhn MA, Schweizer BA, Schmid RA, Kocher GJ. Xiphoidectomy for  
524 Intractable Xiphodynia. World J Surg. 2018 Nov;42(11):3646-3650. doi:  
525 10.1007/s00268-018-4668-9.
- 526 21. Akin K, Kosehan D, Topcu A, Koktener A. Anatomic evaluation of the xiphoid  
527 process with 64-row multidetector computed tomography. Skeletal Radiol.  
528 2011 Apr;40(4):447-52. doi: 10.1007/s00256-010-1022-1.
- 529 22. Migliore M, Signorelli M. Episodic abdominal and chest pain in a young  
530 adult. JAMA. 2012 Apr 25;307(16):1746-7. doi: 10.1001/jama.2012.506.
- 531 23. LIPKIN M, FULTON LA, WOLFSON EA. The syndrome of the hypersensitive  
532 xiphoid. N Engl J Med. 1955 Oct 6;253(14):591-7. doi:  
533 10.1056/NEJM195510062531403.

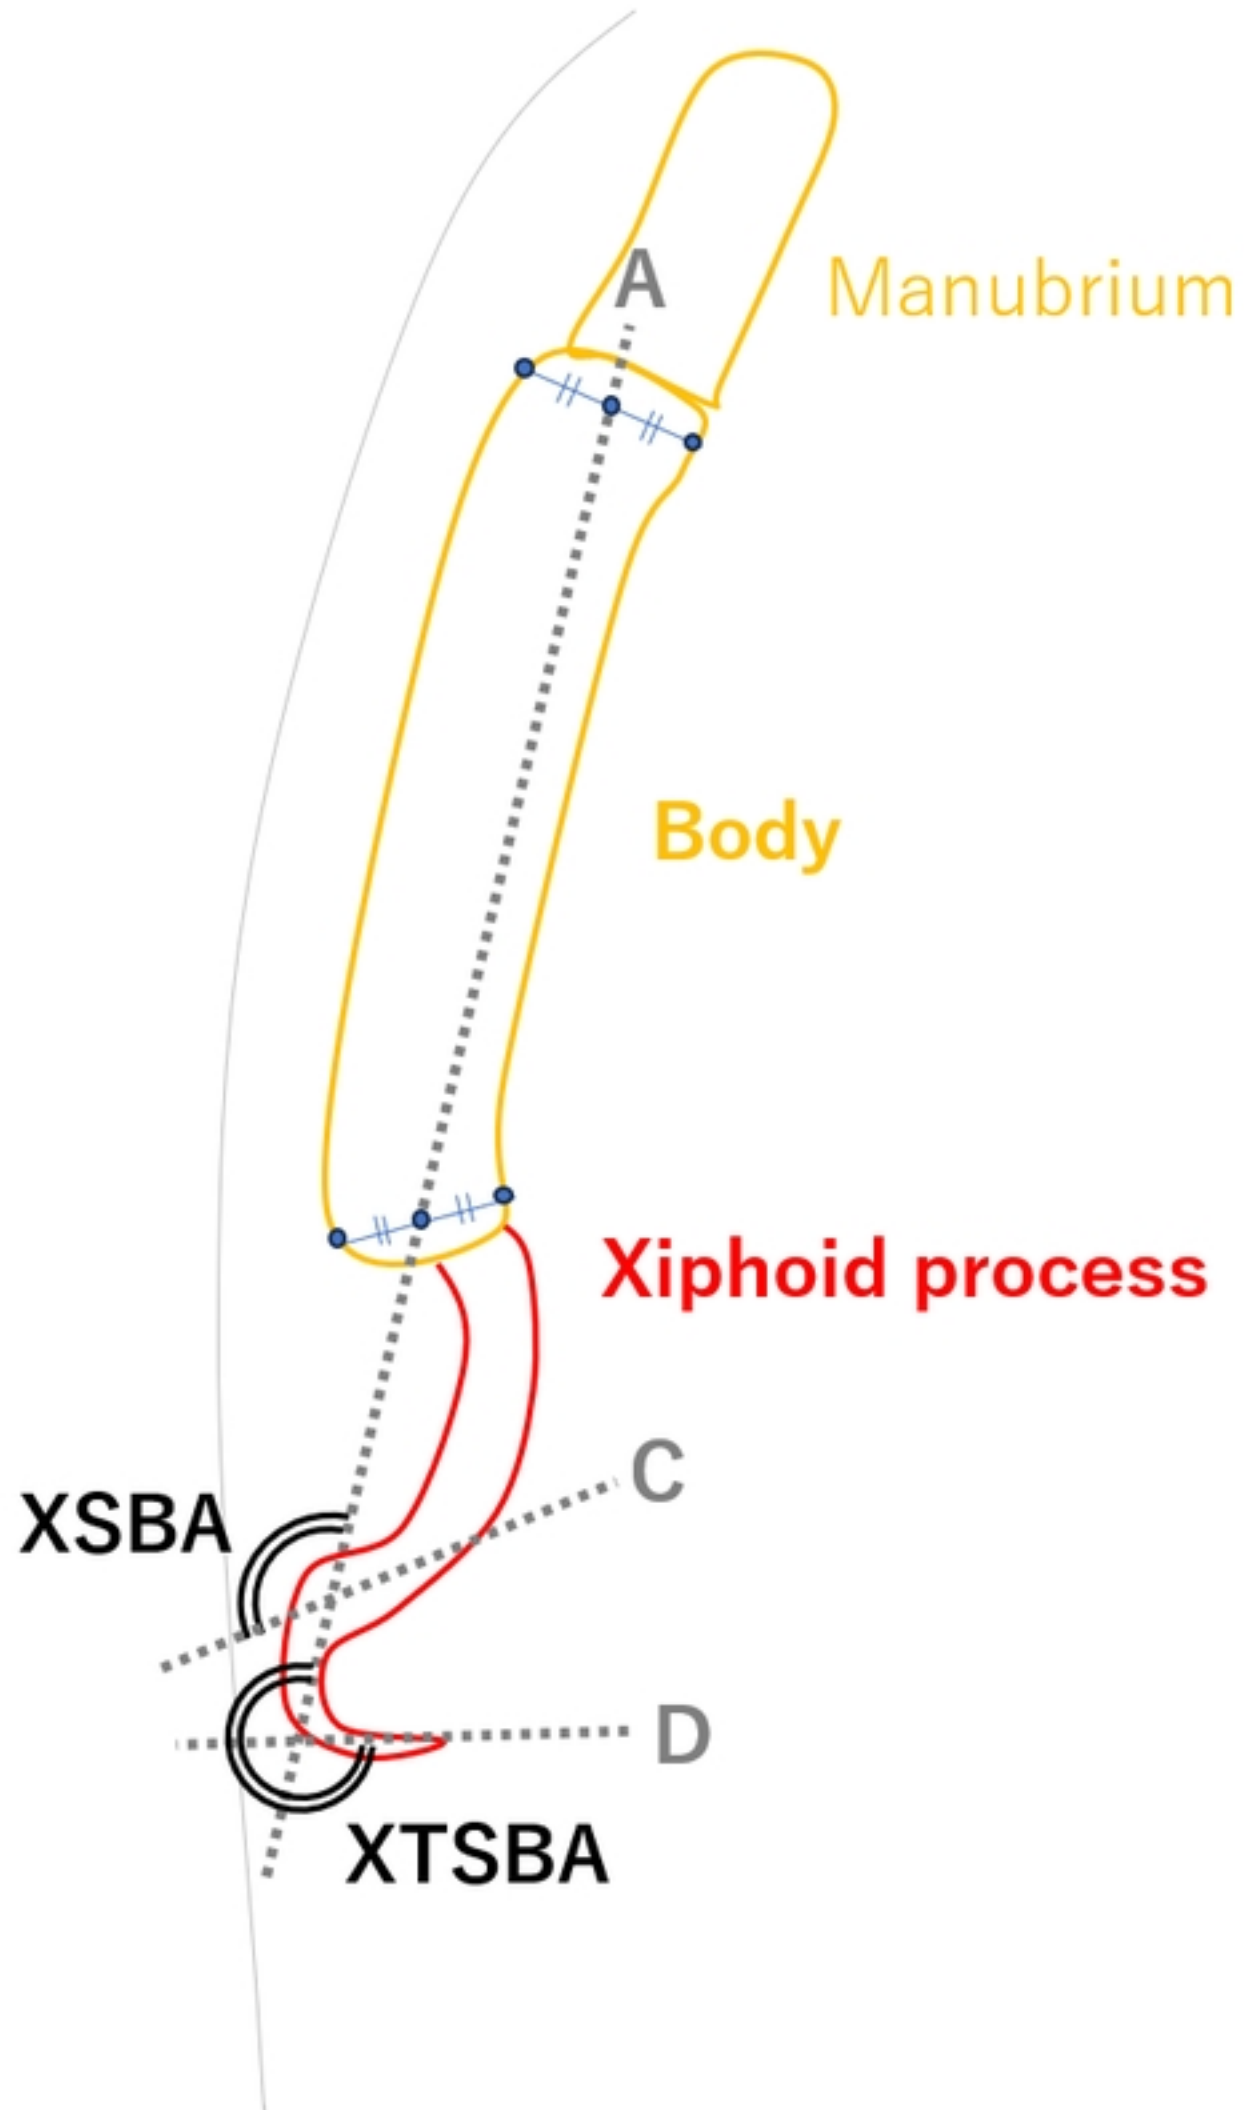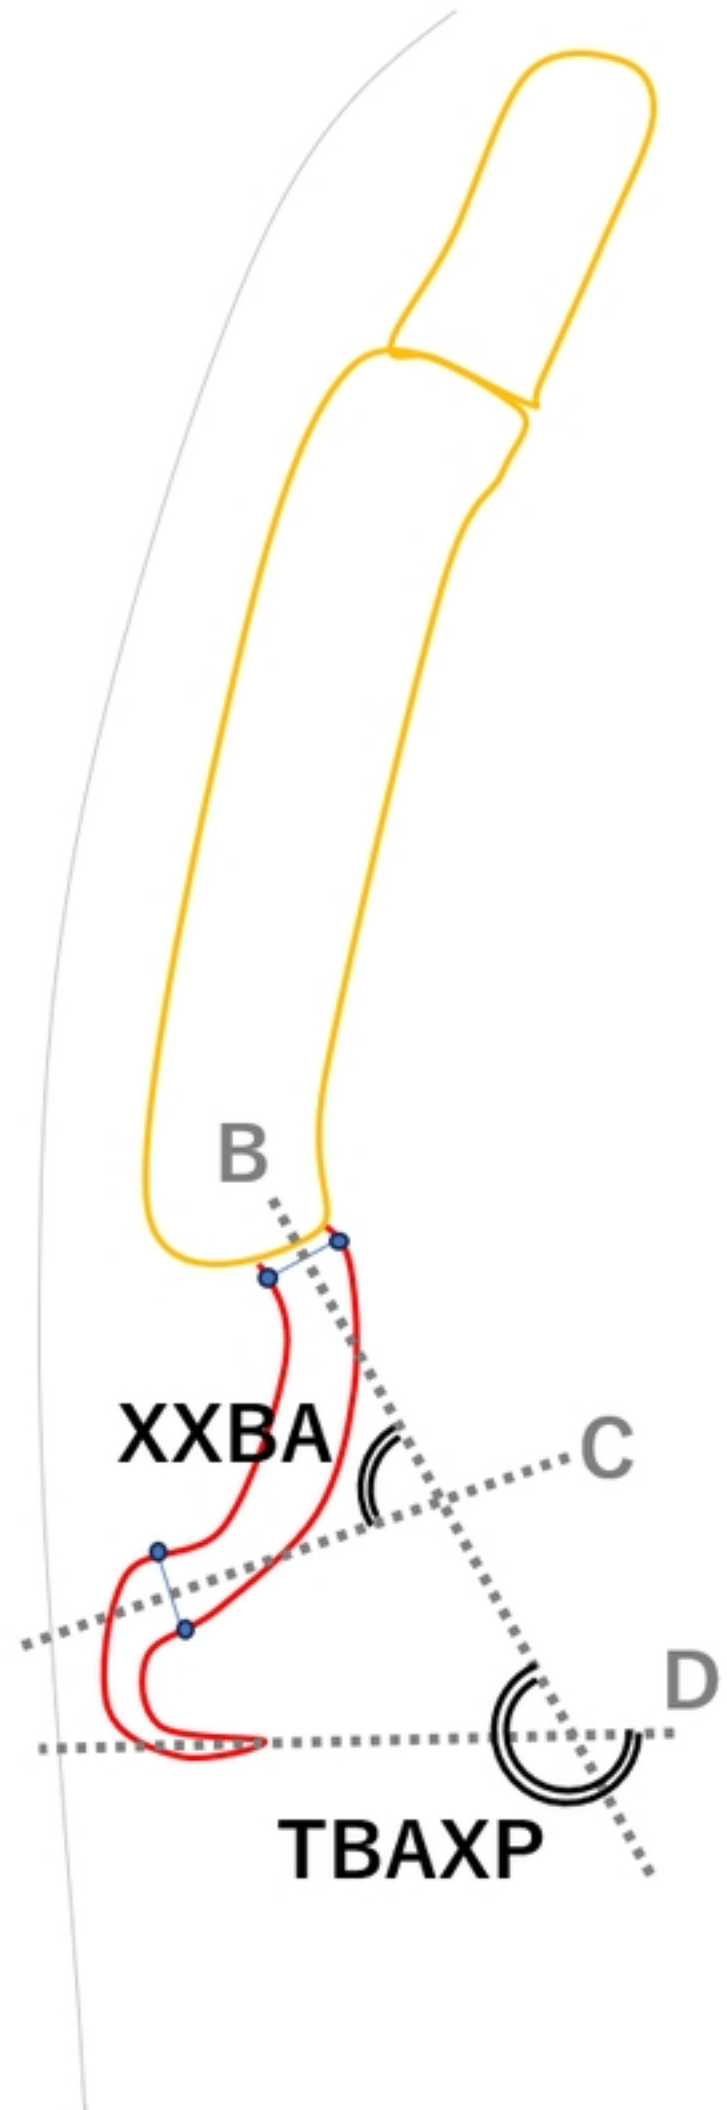

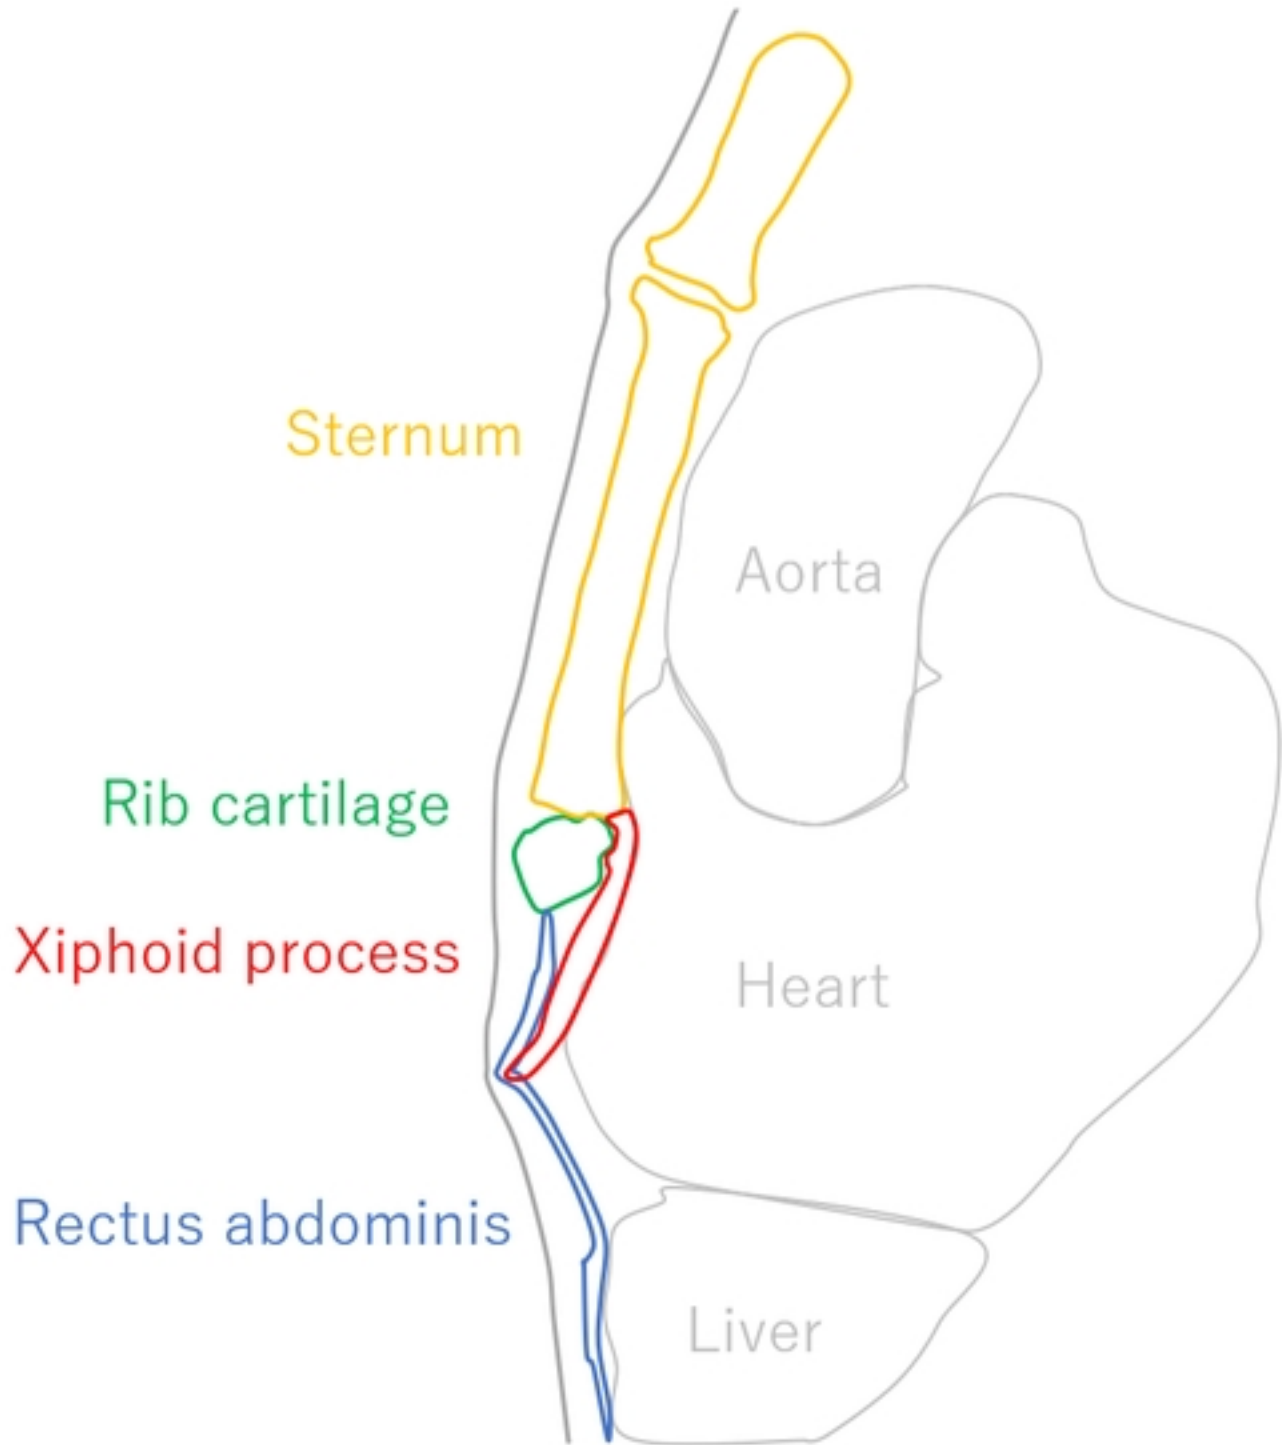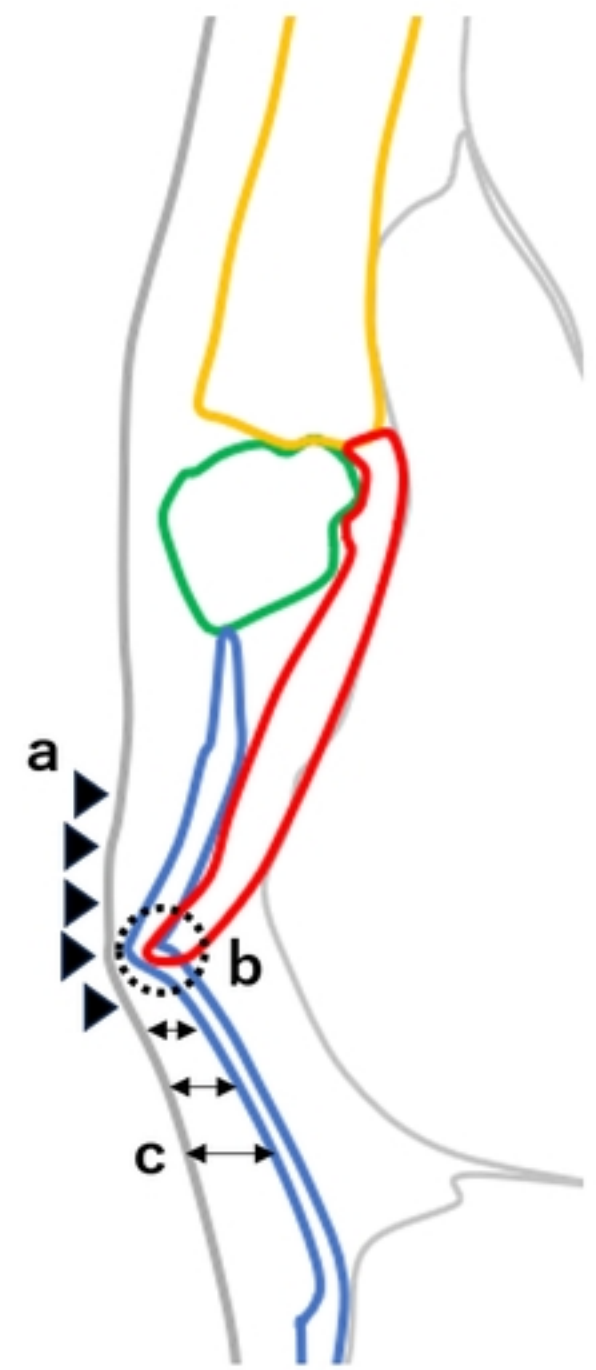

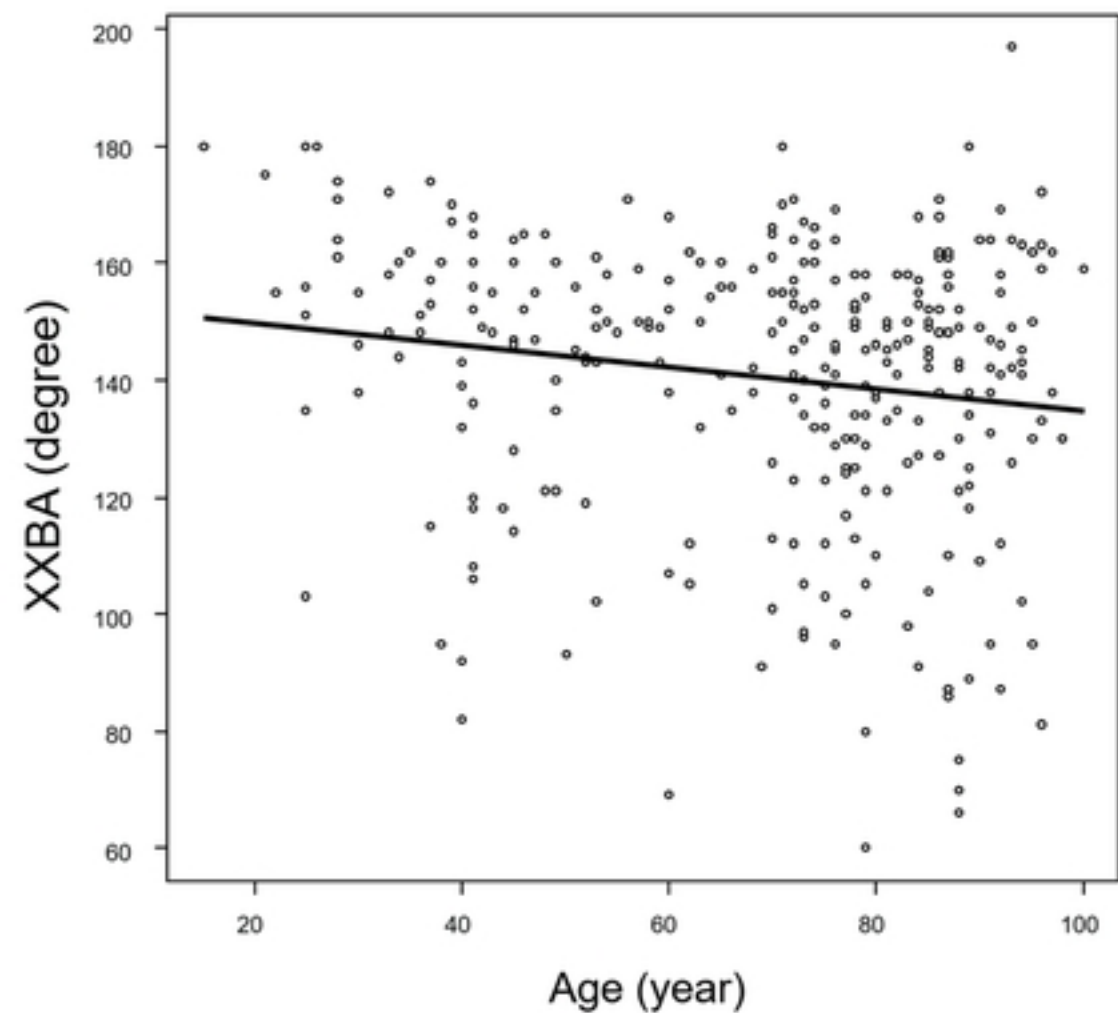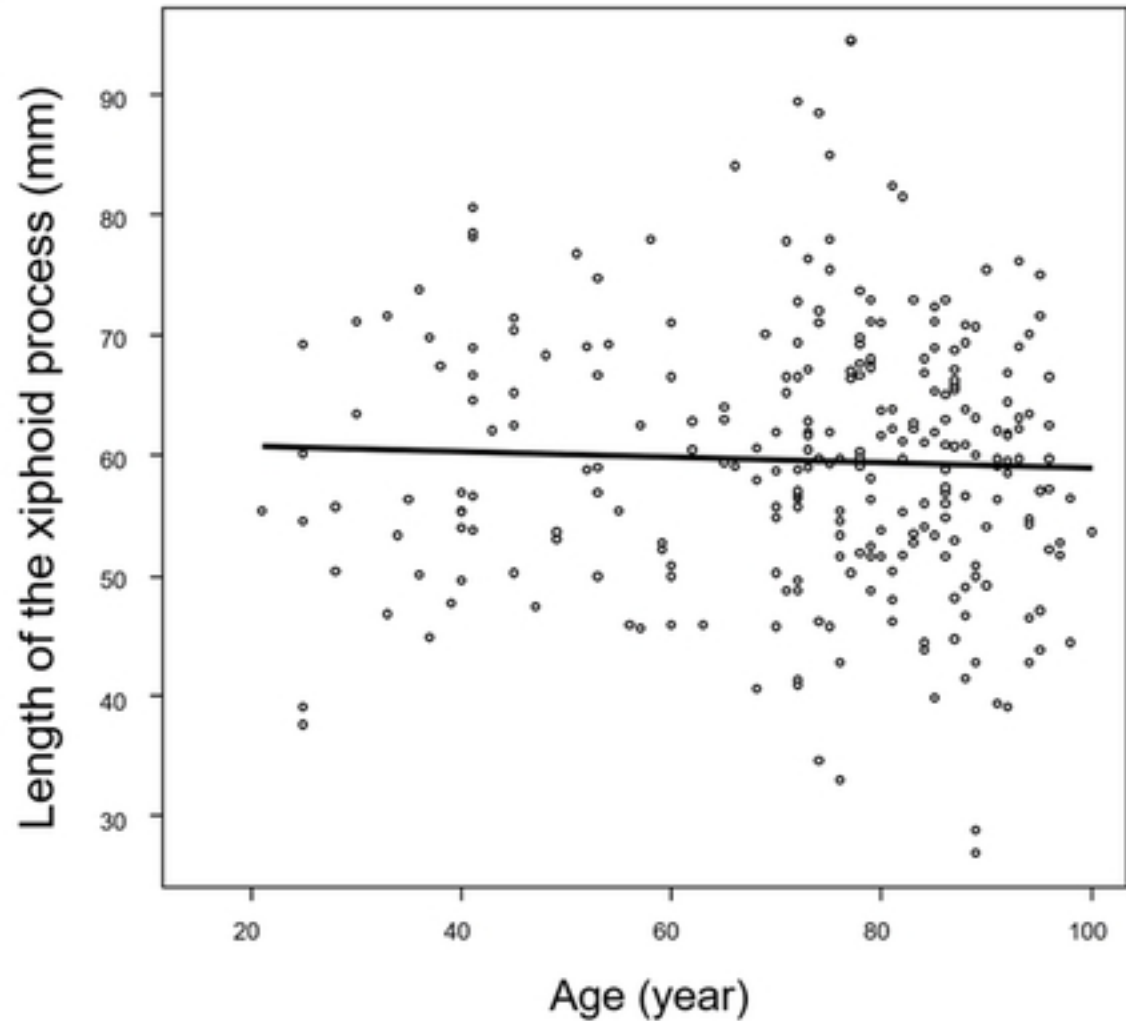

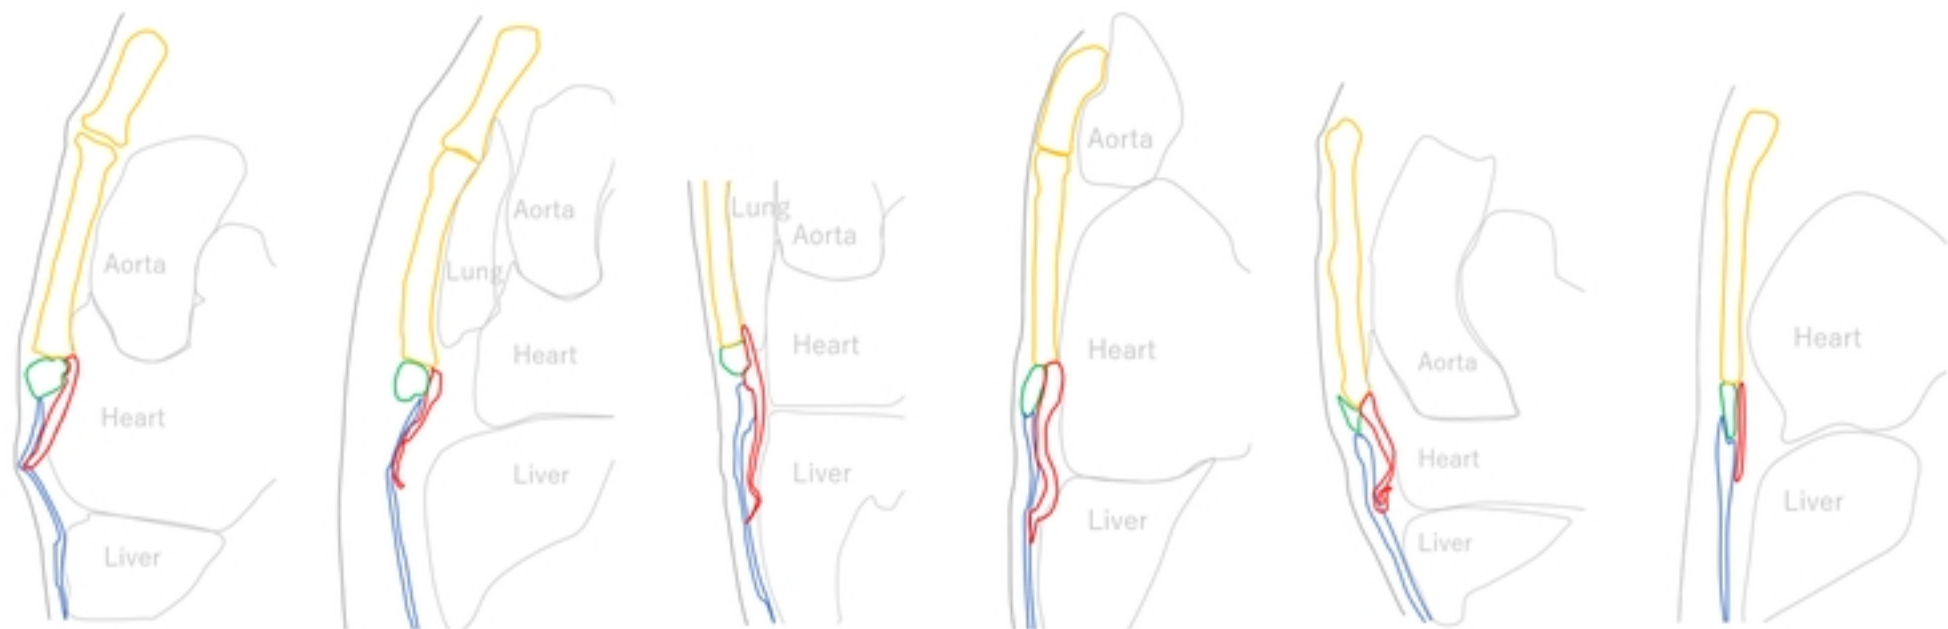

| Shape | F | FB | FBF | FBFB | FBB | S |
|-------|---|----|-----|------|-----|---|
| ASRA  | + | +  | -   | +    | +   | - |
| ASSS  | + | -  | -   | -    | +   | - |
| TST   | + | +  | -   | -    | -   | - |
| PXTRA | + | -  | +   | -    | -   | - |
| HRA   | - | -  | -   | -    | -   | - |

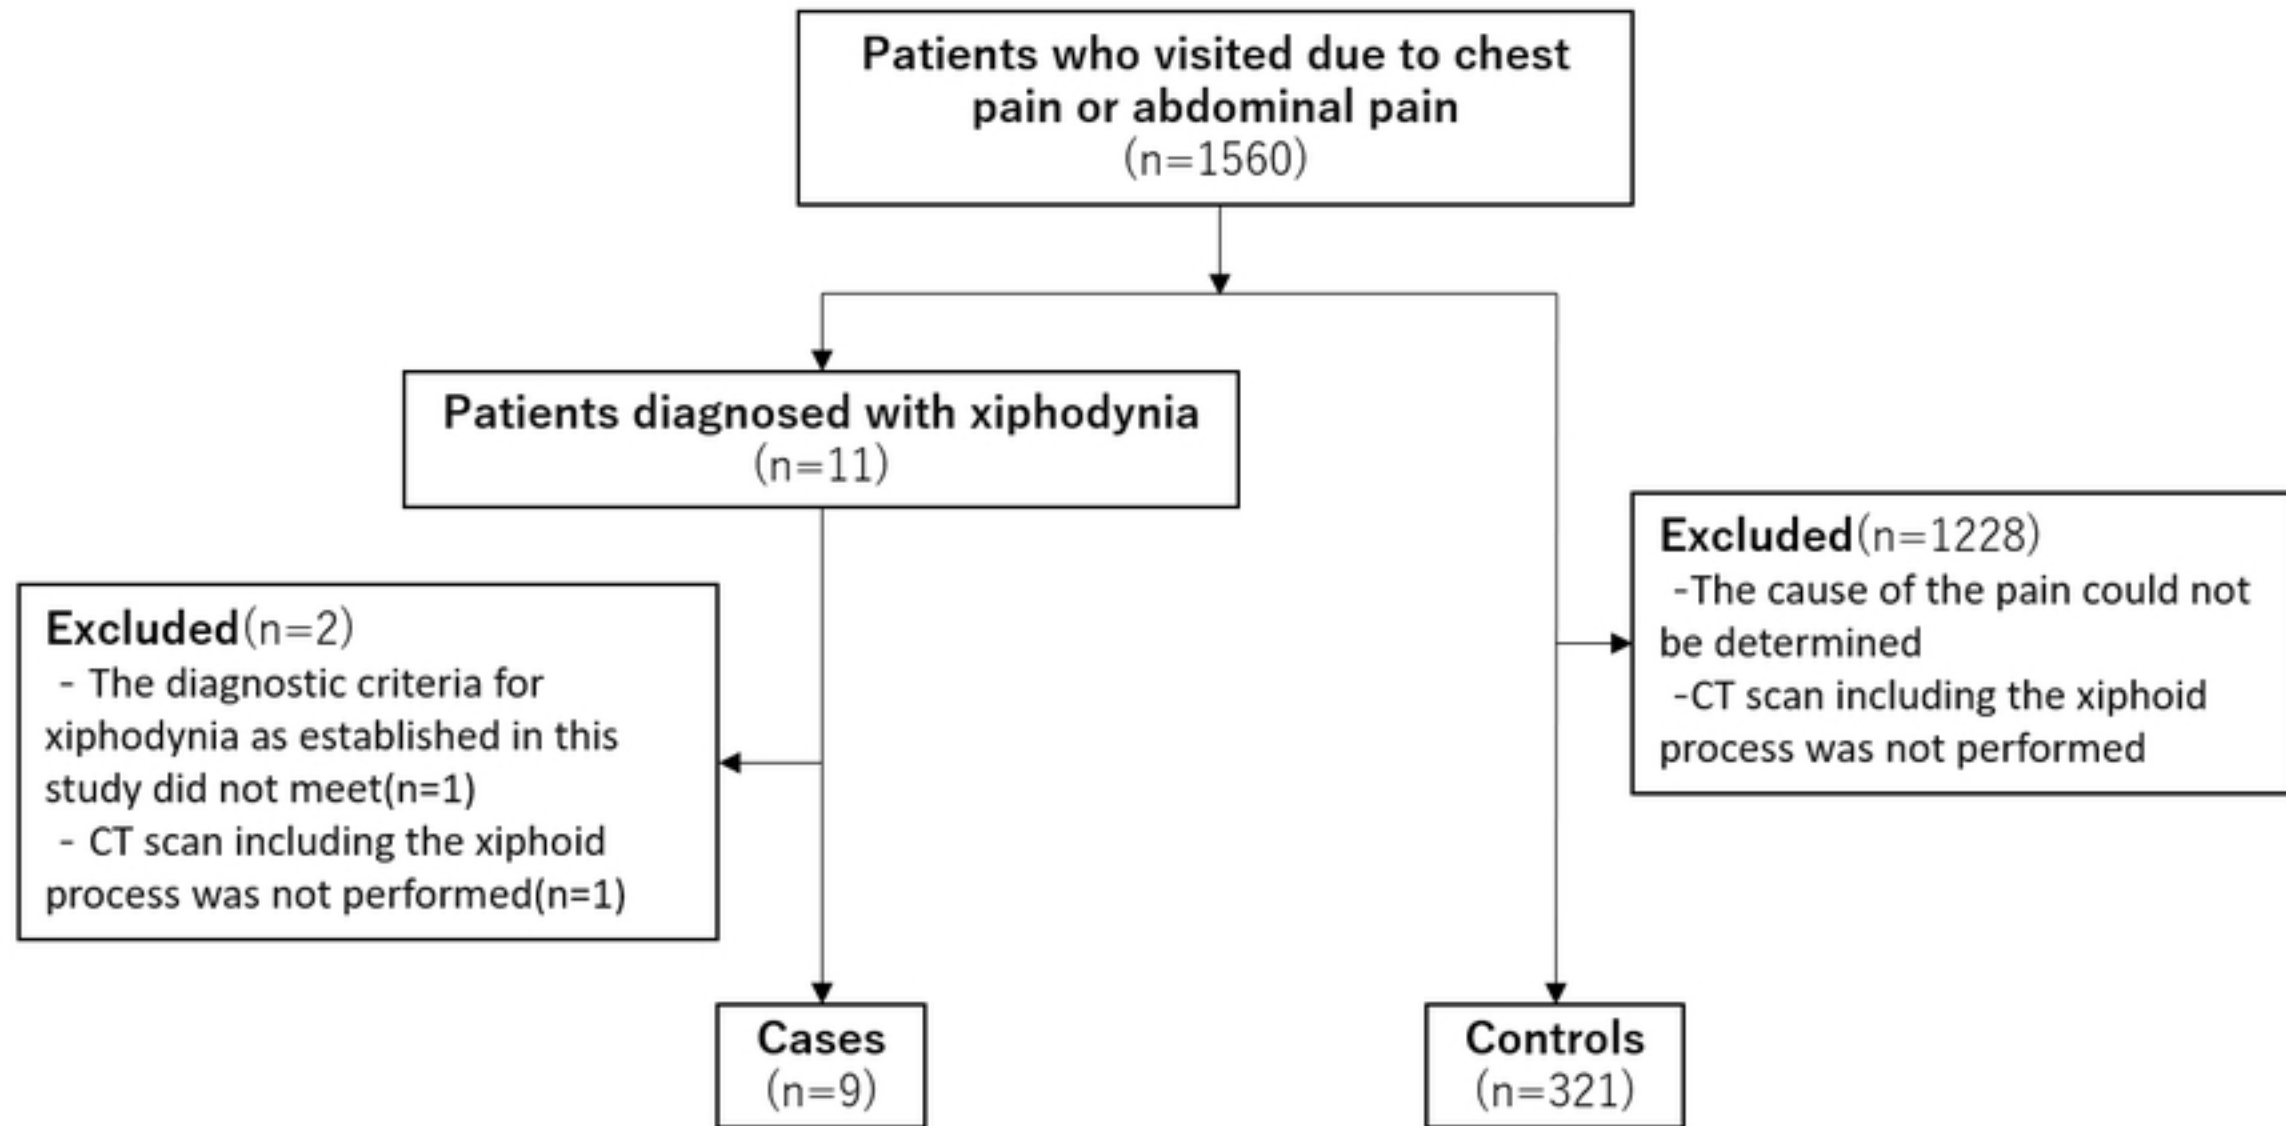

Source: https://medrxiv.org/content/10.1101/2024.05.01.24306684.full.pdf
